# Supplementary material
Source: Springer Nature journal article supplement (https://www.springermedizin.de/resource/supplementary/12961_2011_230_MOESM3_ESM.pdf/9570830)
Supplement: MOESM3 [file 9570830]

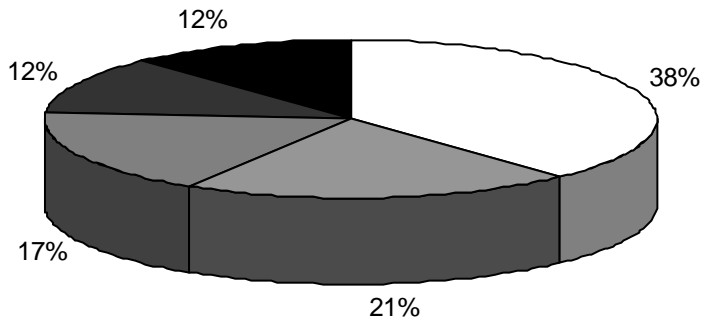

□ Research Institution

■ University

■ Other: e.g. Corporate, Parastatal, Military

■ Ministry of Health

■ International Organization / NGO
